# Supplementary material for: InvaCost, a public database of the economic costs of biological invasions worldwide
Source: PubMed Central journal article supplement (PMC7479195; doi:10.1038/s41597-020-00586-z), 2020-09-08

1 **Supplementary file 1.** Search strings implemented in the ISI Web of Science (A) and PubMed  
2 repository (B) to reach costs associated to invasive mosquito species as part of the targeted  
3 collection. The whole procedure carefully followed the recommendations from PRISMA  
4 (Preferred Reporting Items for Systematic Reviews and Meta-Analyses) statements (C).

5

6 **(A)** Search string used in the ISI Web of Science platform (<https://webofknowledge.com/>):

7 **("cost effectiveness" OR "cost-effectiveness" OR monetary OR dollars OR euros OR**  
8 **sterling OR DALY OR expenditur\* OR economi\* OR "cost of illness" OR "cost-of-illness")**  
9 **AND (TS=(zika OR chikungunya OR dengue OR "yellow fever" OR albopictus OR aegypti))**

10

11 **(B)** Search string used in the PubMed repository (<https://www.ncbi.nlm.nih.gov/pubmed/>)

12 ***cost-effectiveness[Title/Abstract] OR cost effectiveness[Title/Abstract] OR***  
13 ***monetary[Title/Abstract] OR dollars[Title/Abstract] OR euros[Title/Abstract] OR***  
14 ***sterling[Title/Abstract] OR DALY[Title/Abstract] OR expenditur\*[Title/Abstract] OR***  
15 ***economi\*[Title/Abstract] OR cost of illness[Title/Abstract] OR cost-of-***  
16 ***illness[Title/Abstract]) AND (zika[Title/Abstract] OR chikungunya[Title/Abstract] OR***  
17 ***dengue[Title/Abstract] OR yellow fever[Title/Abstract] OR albopictus[Title/Abstract] OR***  
18 ***aegypti[Title/Abstract])***

19

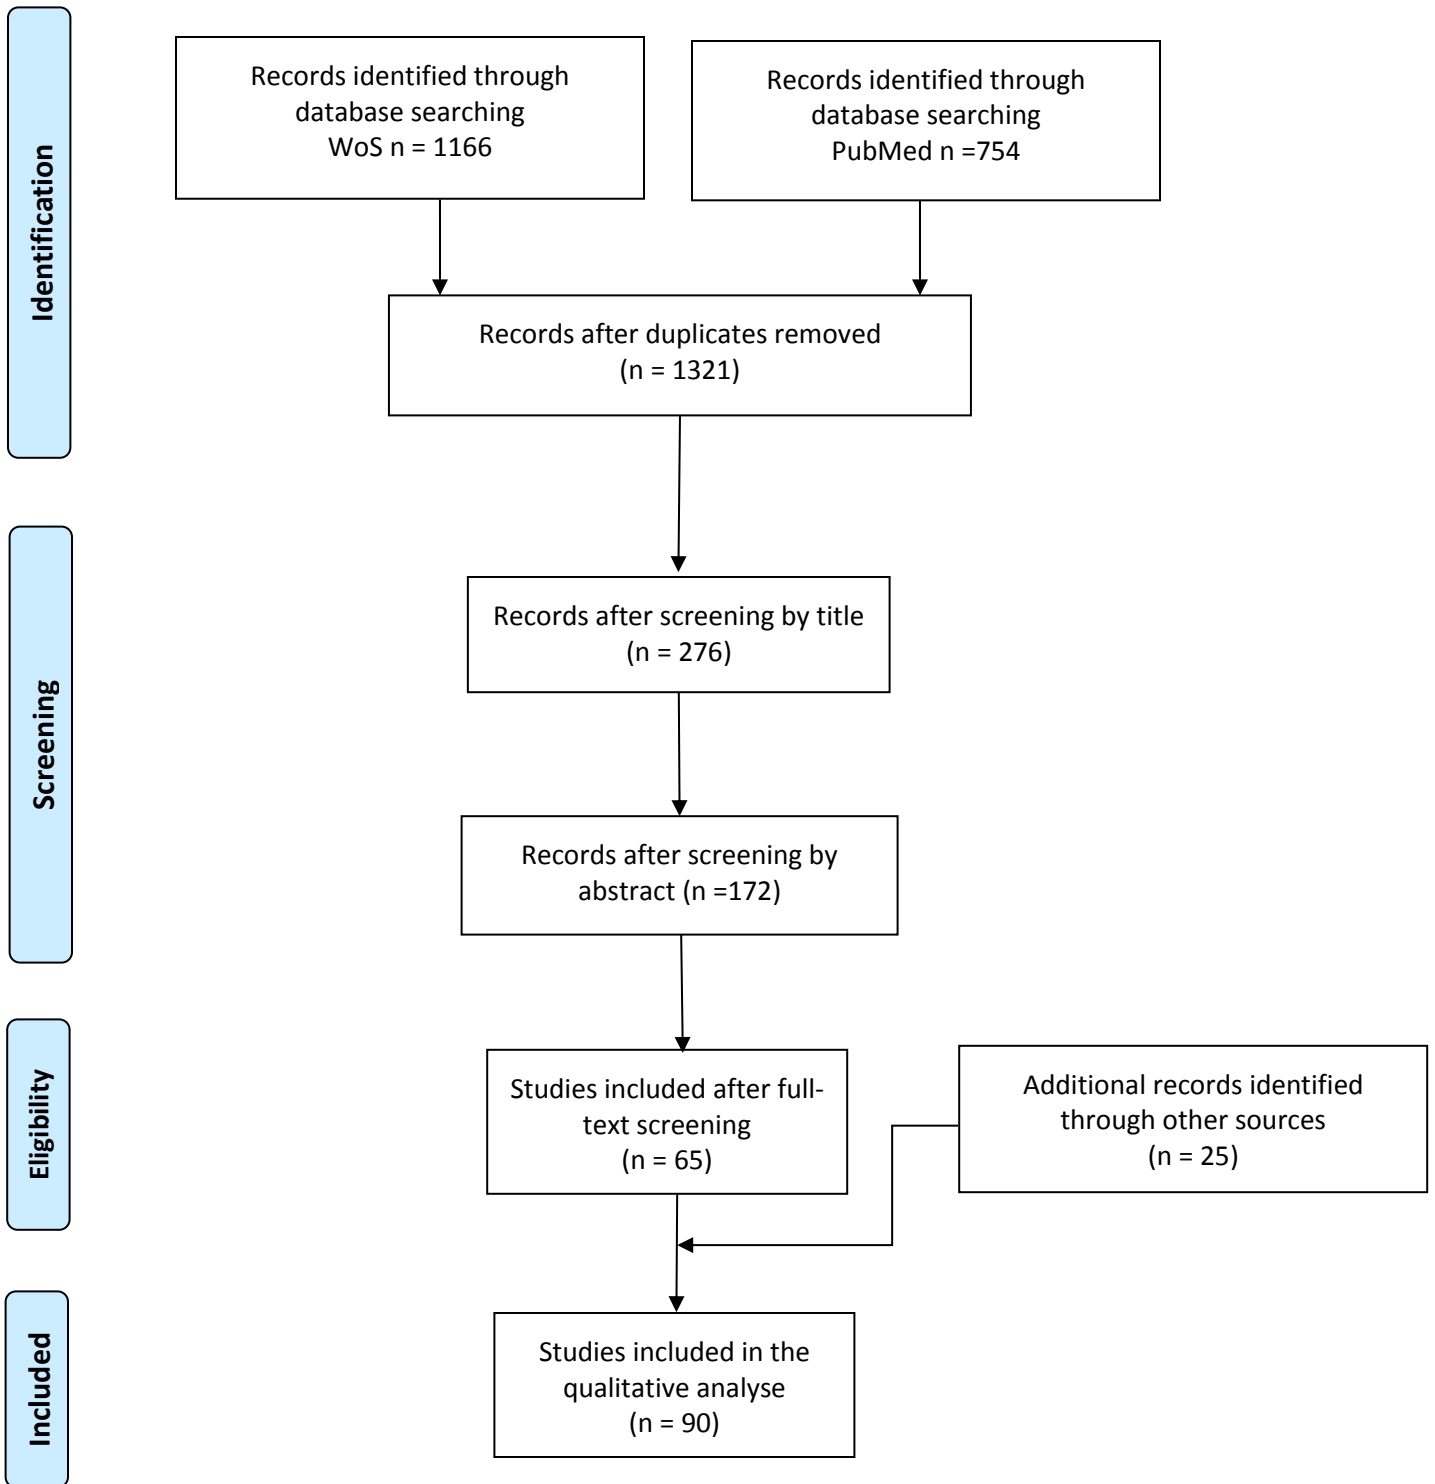

Supplement: 41597_2020_586_MOESM1_ESM.pdf [file 41597_2020_586_MOESM1_ESM.pdf]
