# Supplementary material for: InvaCost, a public database of the economic costs of biological invasions worldwide
Source: PubMed Central journal article supplement (PMC7479195; doi:10.1038/s41597-020-00586-z), 2020-09-08

## **Supplementary file 2**

Distribution of the cost data recorded in INVACOST according to the 'Geographic region' of the cost estimates. *Nref*: Number of materials (in grey); *Ncost*: Number of cost estimates (in blue); *Nhigh*: Number of high reliability estimates (in green); *Ntaxa*: Number of taxonomic units (in red) that refers either to a single species or, if any, unique group of species for which specific contribution to the whole cost is not possible. 'Mixed' contains data concomitantly associated with two or more geographic regions.

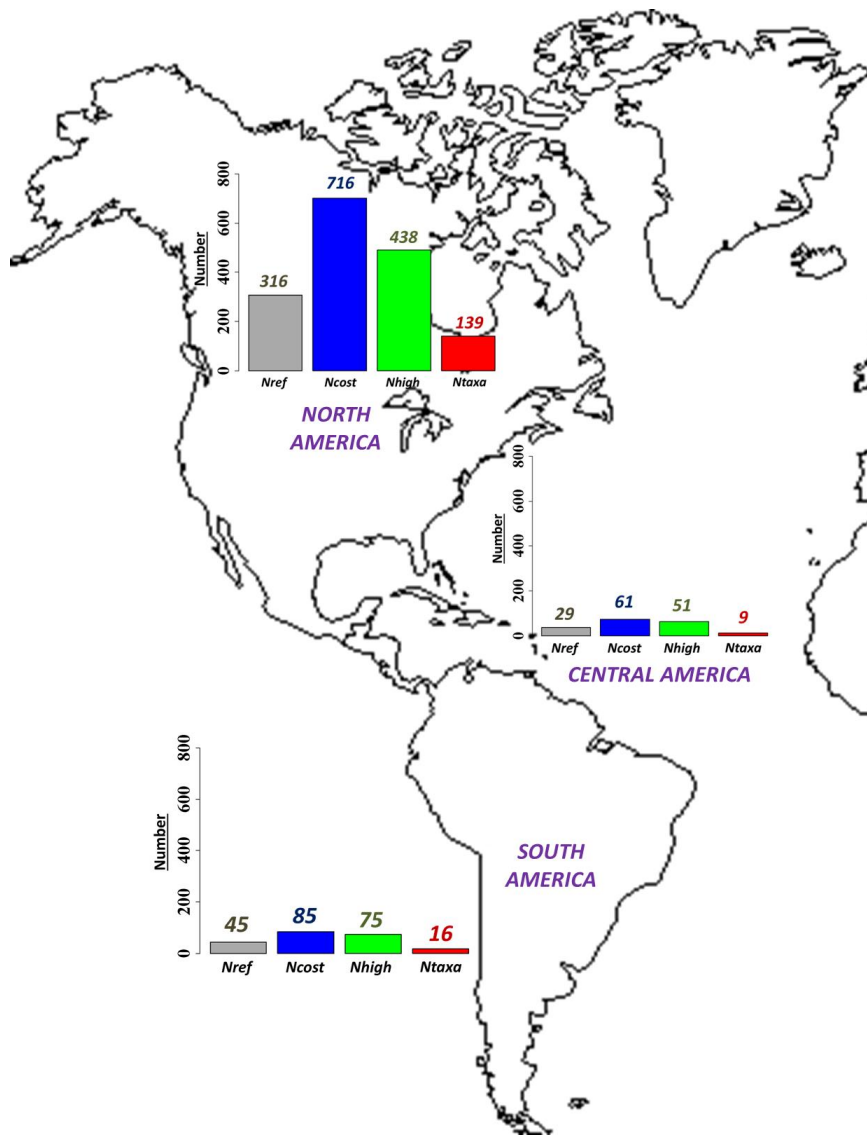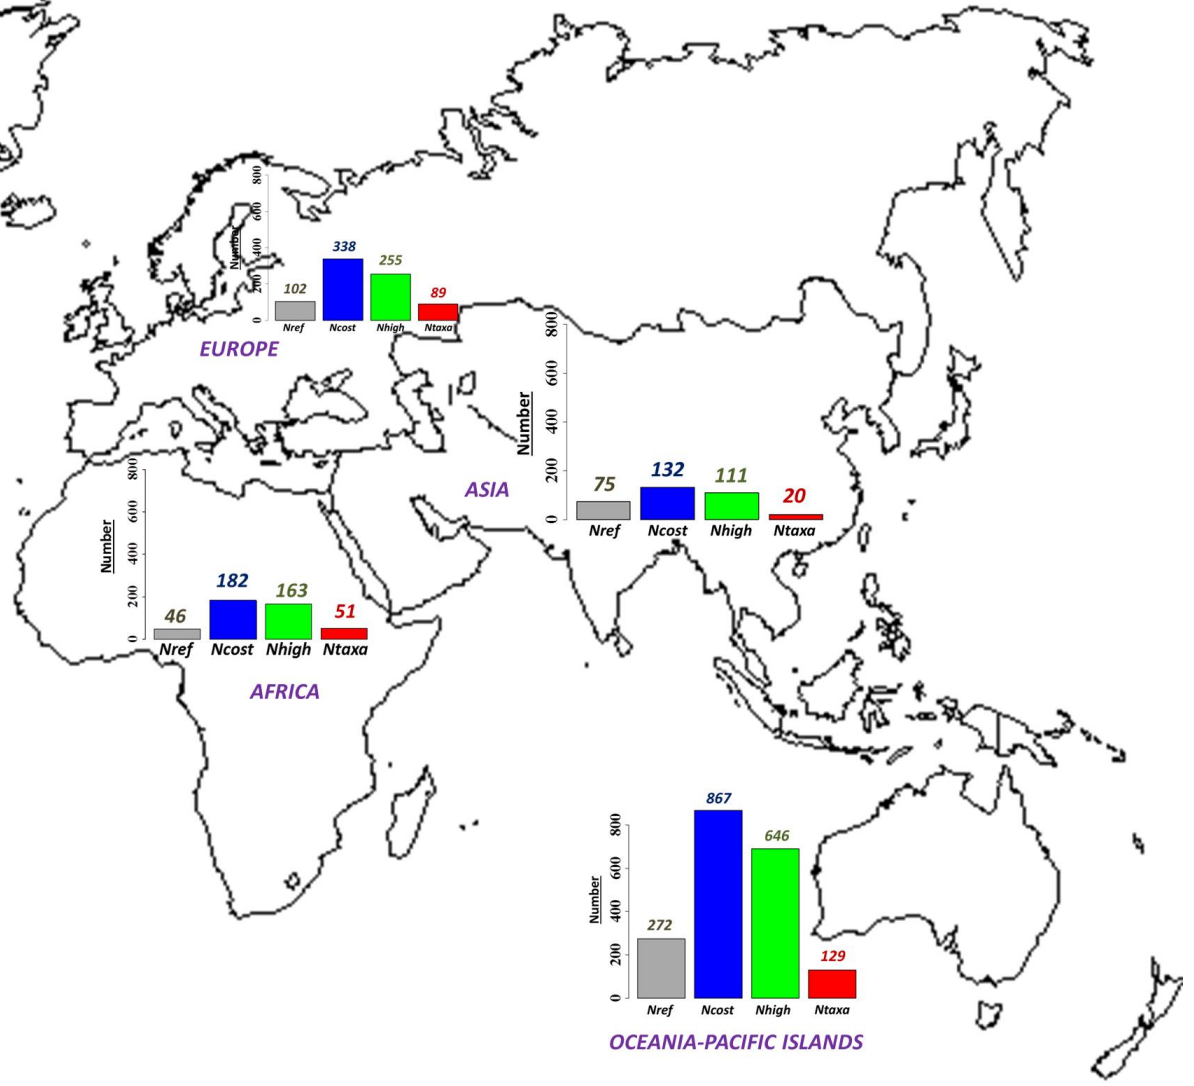

Supplement: 41597_2020_586_MOESM2_ESM.pdf [file 41597_2020_586_MOESM2_ESM.pdf]
