# Supplementary material for: InvaCost, a public database of the economic costs of biological invasions worldwide
Source: PubMed Central journal article supplement (PMC7479195; doi:10.1038/s41597-020-00586-z), 2020-09-08
Supplement: 41597_2020_586_MOESM3_ESM.pdf [file 41597_2020_586_MOESM3_ESM.pdf]

```
###bibl <- dataset (.csv file) with all information extracted from the topic (title = column 2, abstract = column 3, keywords = column 4, keywords plus = column 5)
```

```
###upload dataset "InvaCost_Refs" with all information extracted from the topic (title = column 2, abstract = column 3, keywords = column 4, keywords plus = column = 5  
bibl <- read.csv2("InvaCost_Refs.csv", header=TRUE)
```

```
### total number of references collected from WOS  
publications <- 16875
```

```
#####searching words of interest in each component of the topic#####
```

```
###search in title
```

```
paperlist <- matrix(0,publications,2)  
colnames(paperlist) <- as.character(c("econom_t", "invasi_t"))
```

```
for(i in c(1:publications)) {
```

```
    title <- unlist(as.character(bibl[i,2]))
```

```
    if (!length(grep("econom", title, ignore.case=TRUE, value=TRUE))==0) {paperlist[i,"econom_t"] <-1}  
    if (!length(grep("cost", title, ignore.case=TRUE, value=TRUE))==0) {paperlist[i,"econom_t"] <-1}  
    if (!length(grep("monetary", title, ignore.case=TRUE, value=TRUE))==0) {paperlist[i,"econom_t"] <-1}  
    if (!length(grep("\\$", title, ignore.case=TRUE, value=TRUE))==0) {paperlist[i,"econom_t"] <-1}  
    if (!length(grep("\u20AC", title, ignore.case=TRUE, value=TRUE))==0) {paperlist[i,"econom_t"] <- 1}  
    if (!length(grep("\u00a3", title, ignore.case=TRUE, value=TRUE))==0) {paperlist[i,"econom_t"] <-1}  
    if (!length(grep("dollar", title, ignore.case=TRUE, value=TRUE))==0) {paperlist[i,"econom_t"] <-1}  
    if (!length(grep("euro", title, ignore.case=TRUE, value=TRUE))==0) {paperlist[i,"econom_t"] <-1}  
    if (!length(grep("pound", title, ignore.case=TRUE, value=TRUE))==0) {paperlist[i,"econom_t"] <-1}  
    if (!length(grep("invasi", title, ignore.case=TRUE, value=TRUE))==0) {paperlist[i,"invasi_t"] <- 1}  
    if (!length(grep("alien", title, ignore.case=TRUE, value=TRUE))==0) {paperlist[i,"invasi_t"] <- 1}  
    if (!length(grep("non-indigenous", title, ignore.case=TRUE, value=TRUE))==0) {paperlist[i,"invasi_t"] <- 1}  
    if (!length(grep("non-native", title, ignore.case=TRUE, value=TRUE))==0) {paperlist[i,"invasi_t"] <- 1}  
    if (!length(grep("exotic", title, ignore.case=TRUE, value=TRUE))==0) {paperlist[i,"invasi_t"] <- 1}  
    if (!length(grep("introduced", title, ignore.case=TRUE, value=TRUE))==0) {paperlist[i,"invasi_t"] <- 1}  
    if (!length(grep("naturali", title, ignore.case=TRUE, value=TRUE))==0) {paperlist[i,"invasi_t"] <- 1}  
    if (!length(grep("invader", title, ignore.case=TRUE, value=TRUE))==0) {paperlist[i,"invasi_t"] <- 1}  
}
```

```
write.csv (paperlist, file=("results_title.csv"))
```

```

###search in abstract
paperlist <- matrix(0,publications,2)
colnames(paperlist) <- as.character(c("econom_a" ,"invasi_a"))

for(i in c(1:publications)) {
  abstract <- unlist(as.character(bibl[i,3]))

if (!length(grep("econom", abstract, ignore.case=TRUE, value=TRUE))==0) {paperlist[i,"econom_a"] <-
paperlist[i,"econom_a"] + 1}
if (!length(grep("cost", abstract, ignore.case=TRUE, value=TRUE))==0) {paperlist[i,"econom_a"] <-
paperlist[i,"econom_a"] + 1}
if (!length(grep("monetary", abstract, ignore.case=TRUE, value=TRUE))==0) {paperlist[i,"econom_a"]
<-paperlist[i,"econom_a"] + 1}
if (!length(grep("\\$", abstract, ignore.case=TRUE, value=TRUE))==0) {paperlist[i,"econom_a"] <-
paperlist[i,"econom_a"] + 1}
if (!length(grep("\u20AC", abstract, ignore.case=TRUE, value=TRUE))==0) {paperlist[i,"econom_a"] <-
paperlist[i,"econom_a"] + 1}
if (!length(grep("\u00a3", abstract, ignore.case=TRUE, value=TRUE))==0) {paperlist[i,"econom_a"] <-
paperlist[i,"econom_a"] + 1}
if (!length(grep("dollar", abstract, ignore.case=TRUE, value=TRUE))==0) {paperlist[i,"econom_a"] <-
paperlist[i,"econom_a"] + 1}
if (!length(grep("euro", abstract, ignore.case=TRUE, value=TRUE))==0) {paperlist[i,"econom_a"] <-
paperlist[i,"econom_a"] + 1}
if (!length(grep("pound", abstract, ignore.case=TRUE, value=TRUE))==0) {paperlist[i,"econom_a"] <-
paperlist[i,"econom_a"] + 1}
if (!length(grep("invasi", abstract, ignore.case=TRUE, value=TRUE))==0) {paperlist[i,"invasi_a"] <-
paperlist[i,"invasi_a"] + 1}
if (!length(grep("alien", abstract, ignore.case=TRUE, value=TRUE))==0) {paperlist[i,"invasi_a"] <-
paperlist[i,"invasi_a"] + 1}
if (!length(grep("non-indigenous", abstract, ignore.case=TRUE, value=TRUE))==0)
{paperlist[i,"invasi_a"] <- paperlist[i,"invasi_a"] + 1}
if (!length(grep("non-native", abstract, ignore.case=TRUE, value=TRUE))==0) {paperlist[i,"invasi_a"] <-
paperlist[i,"invasi_a"] + 1}
if (!length(grep("exotic", abstract, ignore.case=TRUE, value=TRUE))==0) {paperlist[i,"invasi_a"] <-
paperlist[i,"invasi_a"] + 1}
if (!length(grep("introduced", abstract, ignore.case=TRUE, value=TRUE))==0) {paperlist[i,"invasi_a"]
<- paperlist[i,"invasi_a"] + 1}
if (!length(grep("naturali", abstract, ignore.case=TRUE, value=TRUE))==0) {paperlist[i,"invasi_a"] <-
paperlist[i,"invasi_a"] + 1}
if (!length(grep("invader", abstract, ignore.case=TRUE, value=TRUE))==0) {paperlist[i,"invasi_a"] <-
paperlist[i,"invasi_a"] + 1}

}

write.csv (paperlist, file=("results_abstract.csv"))

```

```

###search in keywords
paperlist <- matrix(0,publications,2)
colnames(paperlist) <- as.character(c("econom_k" ,"invasi_k"))

for(i in c(1:publications)) {
  keywords <- unlist(as.character(bibl[i,4]))

if (!length(grep("econom", keywords, ignore.case=TRUE, value=TRUE))==0) {paperlist[i,"econom_k"]
<-paperlist[i,"econom_k"] + 1}
if (!length(grep("cost", keywords, ignore.case=TRUE, value=TRUE))==0) {paperlist[i,"econom_k"] <-
paperlist[i,"econom_k"] + 1}
if (!length(grep("monetary", keywords, ignore.case=TRUE, value=TRUE))==0)
{paperlist[i,"econom_k"] <-paperlist[i,"econom_k"] + 1}
if (!length(grep("\\$", keywords, ignore.case=TRUE, value=TRUE))==0) {paperlist[i,"econom_k"] <-
paperlist[i,"econom_k"] + 1}
if (!length(grep("\u20AC", keywords, ignore.case=TRUE, value=TRUE))==0) {paperlist[i,"econom_k"]
<- paperlist[i,"econom_k"] + 1}
if (!length(grep("\\\u00a3", keywords, ignore.case=TRUE, value=TRUE))==0) {paperlist[i,"econom_k"] <-
paperlist[i,"econom_k"] + 1}
if (!length(grep("dollar", keywords, ignore.case=TRUE, value=TRUE))==0) {paperlist[i,"econom_k"] <-
paperlist[i,"econom_k"] + 1}
if (!length(grep("euro", keywords, ignore.case=TRUE, value=TRUE))==0) {paperlist[i,"econom_k"] <-
paperlist[i,"econom_k"] + 1}
if (!length(grep("pound", keywords, ignore.case=TRUE, value=TRUE))==0) {paperlist[i,"econom_k"] <-
paperlist[i,"econom_k"] + 1}
if (!length(grep("invasi", keywords, ignore.case=TRUE, value=TRUE))==0) {paperlist[i,"invasi_k"] <-
paperlist[i,"invasi_k"] + 1}
if (!length(grep("alien", keywords, ignore.case=TRUE, value=TRUE))==0) {paperlist[i,"invasi_k"] <-
paperlist[i,"invasi_k"] + 1}
if (!length(grep("non-indigenous", keywords, ignore.case=TRUE, value=TRUE))==0)
{paperlist[i,"invasi_k"] <- paperlist[i,"invasi_k"] + 1}
if (!length(grep("non-native", keywords, ignore.case=TRUE, value=TRUE))==0) {paperlist[i,"invasi_k"]
<- paperlist[i,"invasi_k"] + 1}
if (!length(grep("exotic", keywords, ignore.case=TRUE, value=TRUE))==0) {paperlist[i,"invasi_k"] <-
paperlist[i,"invasi_k"] + 1}
if (!length(grep("introduced", keywords, ignore.case=TRUE, value=TRUE))==0) {paperlist[i,"invasi_k"]
<- paperlist[i,"invasi_k"] + 1}
if (!length(grep("naturali", keywords, ignore.case=TRUE, value=TRUE))==0) {paperlist[i,"invasi_k"] <-
paperlist[i,"invasi_k"] + 1}
if (!length(grep("invader", keywords, ignore.case=TRUE, value=TRUE))==0) {paperlist[i,"invasi_k"] <-
paperlist[i,"invasi_k"] + 1}

}

write.csv (paperlist, file=("results_keywords.csv"))

```

```

###search in keywords pluspaperlist <- matrix(0,publications,2)
colnames(paperlist) <- as.character(c("econom_kp" ,"invasi_kp"))

for(i in c(1:publications)) {
  keywordsPlus <- unlist(as.character(bibl[i,5]))

  if (!length(grep("econom", keywordsPlus, ignore.case=TRUE, value=TRUE))==0)
  {paperlist[i,"econom_kp"] <-paperlist[i,"econom_kp"] + 1}
  if (!length(grep("cost", keywordsPlus, ignore.case=TRUE, value=TRUE))==0) {paperlist[i,"econom_kp"]
  <-paperlist[i,"econom_kp"] + 1}
  if (!length(grep("monetary", keywordsPlus, ignore.case=TRUE, value=TRUE))==0)
  {paperlist[i,"econom_kp"] <-paperlist[i,"econom_kp"] + 1}
  if (!length(grep("\\$", keywordsPlus, ignore.case=TRUE, value=TRUE))==0) {paperlist[i,"econom_kp"]
  <-paperlist[i,"econom_kp"] + 1}
  if (!length(grep("\\u20AC", keywordsPlus, ignore.case=TRUE, value=TRUE))==0)
  {paperlist[i,"econom_kp"] <- paperlist[i,"econom_kp"] + 1}
  if (!length(grep("\\£", keywordsPlus, ignore.case=TRUE, value=TRUE))==0) {paperlist[i,"econom_kp"]
  <-paperlist[i,"econom_kp"] + 1}
  if (!length(grep("dollar", keywordsPlus, ignore.case=TRUE, value=TRUE))==0)
  {paperlist[i,"econom_kp"] <-paperlist[i,"econom_kp"] + 1}
  if (!length(grep("euro", keywordsPlus, ignore.case=TRUE, value=TRUE))==0)
  {paperlist[i,"econom_kp"] <-paperlist[i,"econom_kp"] + 1}
  if (!length(grep("pound", keywordsPlus, ignore.case=TRUE, value=TRUE))==0)
  {paperlist[i,"econom_kp"] <-paperlist[i,"econom_kp"] + 1}
  if (!length(grep("invasi", keywordsPlus, ignore.case=TRUE, value=TRUE))==0) {paperlist[i,"invasi_kp"]
  <- paperlist[i,"invasi_kp"] + 1}
  if (!length(grep("alien", keywordsPlus, ignore.case=TRUE, value=TRUE))==0) {paperlist[i,"invasi_kp"]
  <- paperlist[i,"invasi_kp"] + 1}
  if (!length(grep("non-indigenous", keywordsPlus, ignore.case=TRUE, value=TRUE))==0)
  {paperlist[i,"invasi_kp"] <- paperlist[i,"invasi_kp"] + 1}
  if (!length(grep("non-native", keywordsPlus, ignore.case=TRUE, value=TRUE))==0)
  {paperlist[i,"invasi_kp"] <- paperlist[i,"invasi_kp"] + 1}
  if (!length(grep("exotic", keywordsPlus, ignore.case=TRUE, value=TRUE))==0) {paperlist[i,"invasi_kp"]
  <- paperlist[i,"invasi_kp"] + 1}
  if (!length(grep("introduced", keywordsPlus, ignore.case=TRUE, value=TRUE))==0)
  {paperlist[i,"invasi_kp"] <- paperlist[i,"invasi_kp"] + 1}
  if (!length(grep("naturali", keywordsPlus, ignore.case=TRUE, value=TRUE))==0)
  {paperlist[i,"invasi_kp"] <- paperlist[i,"invasi_kp"] + 1}
  if (!length(grep("invader", keywordsPlus, ignore.case=TRUE, value=TRUE))==0)
  {paperlist[i,"invasi_kp"] <- paperlist[i,"invasi_kp"] + 1}

}

write.csv (paperlist, file=("results_keywordsPlus.csv"))

```
